# Supplementary material
Source: PubMed Central journal article supplement (PMC3739040)

## Supplemental Figure Legends

### **Figure 1**

Time to first treatment for patients with “no initial therapy”

### **Figure 2**

Overall survival by era of diagnosis: (A) Stage 1 and 2 (B) Stage 3 and 4

### **Figure 3**

Overall survival by era of diagnosis: (A) Age < 60 years (B) Age ≥ 60 years

### **Figure 4**

Comparison of observed versus expected survival by era of diagnosis. (A) Females; (B) Males (C) All Patients.

### **Figure 5**

Overall survival by era of diagnosis excluding vaccinated patients.

### **Figure 6**

Overall survival post first event by era of diagnosis.

Supplementary Figure 1

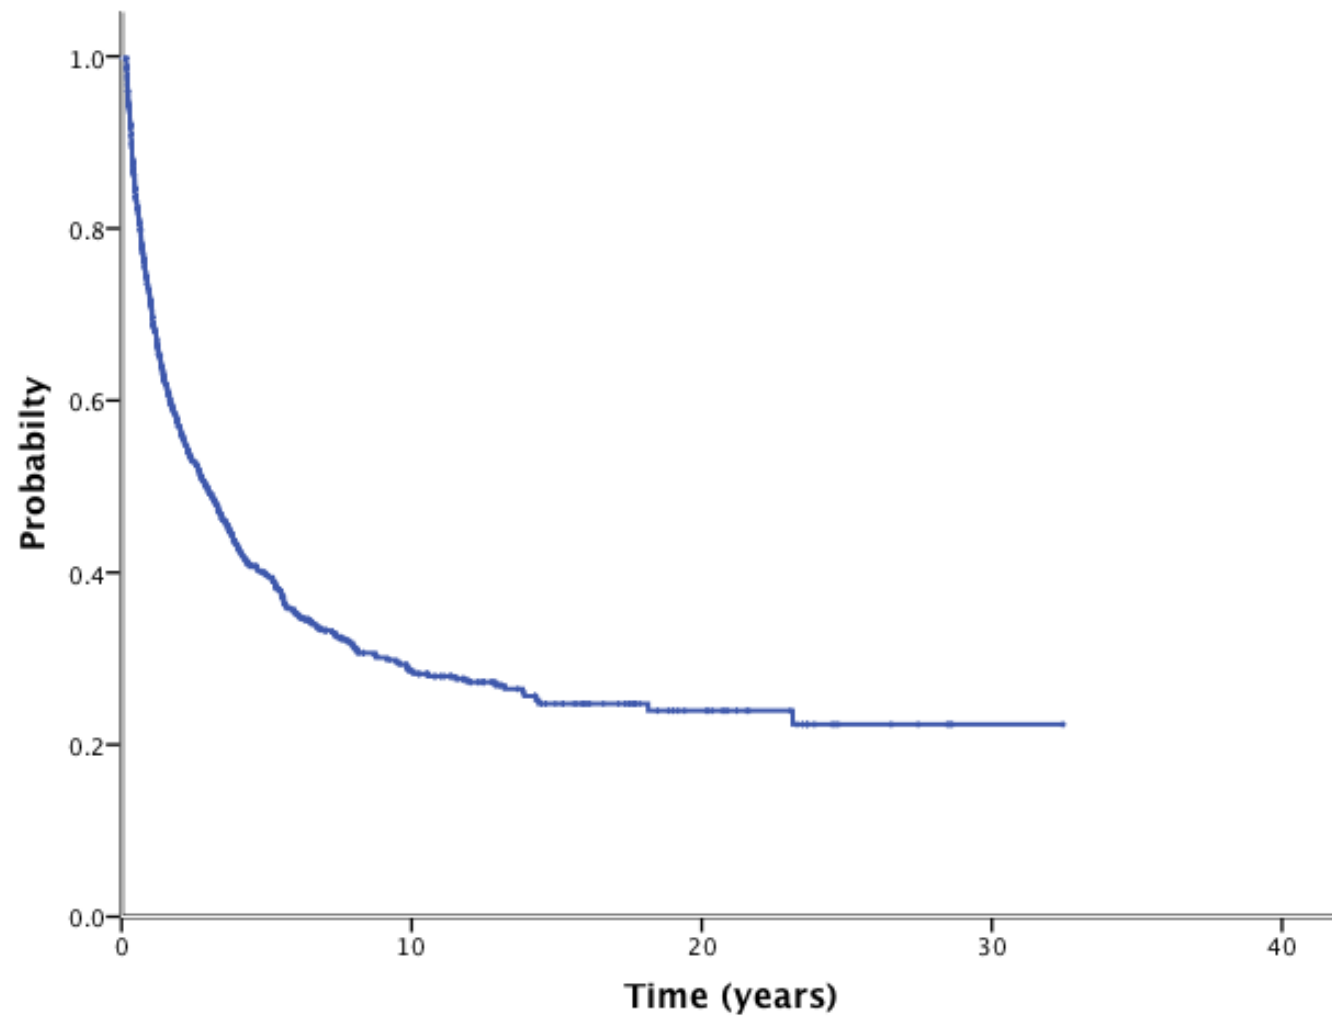

Supplementary Figure 2(A)

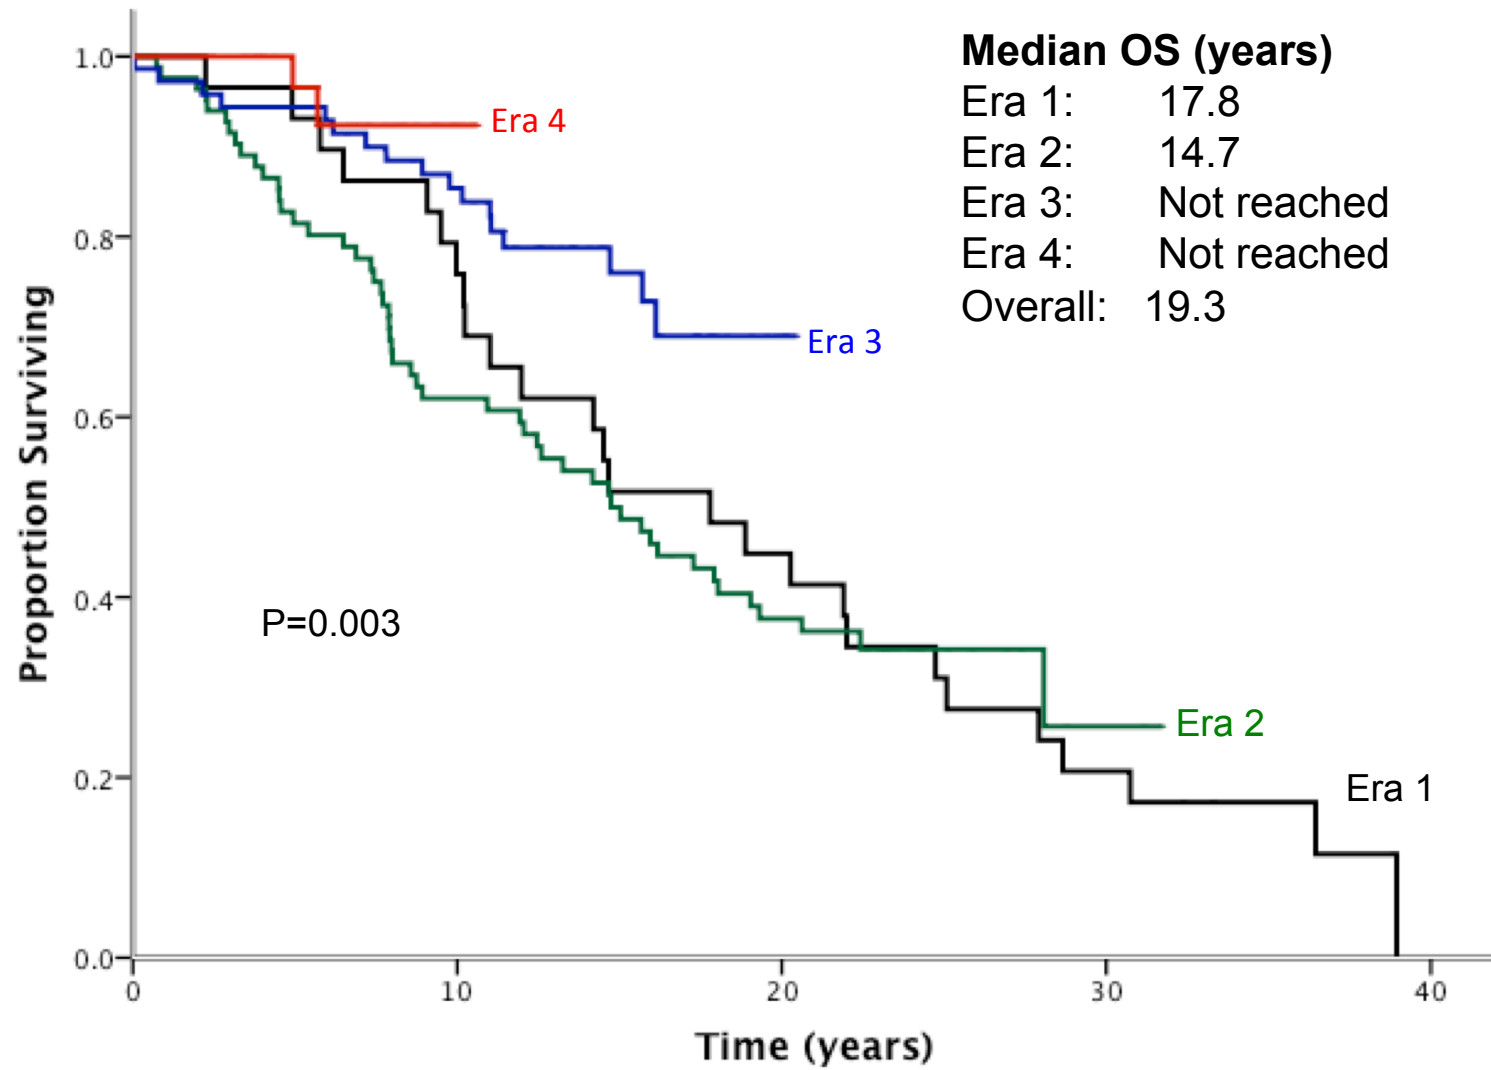

Supplementary Figure 2(B)

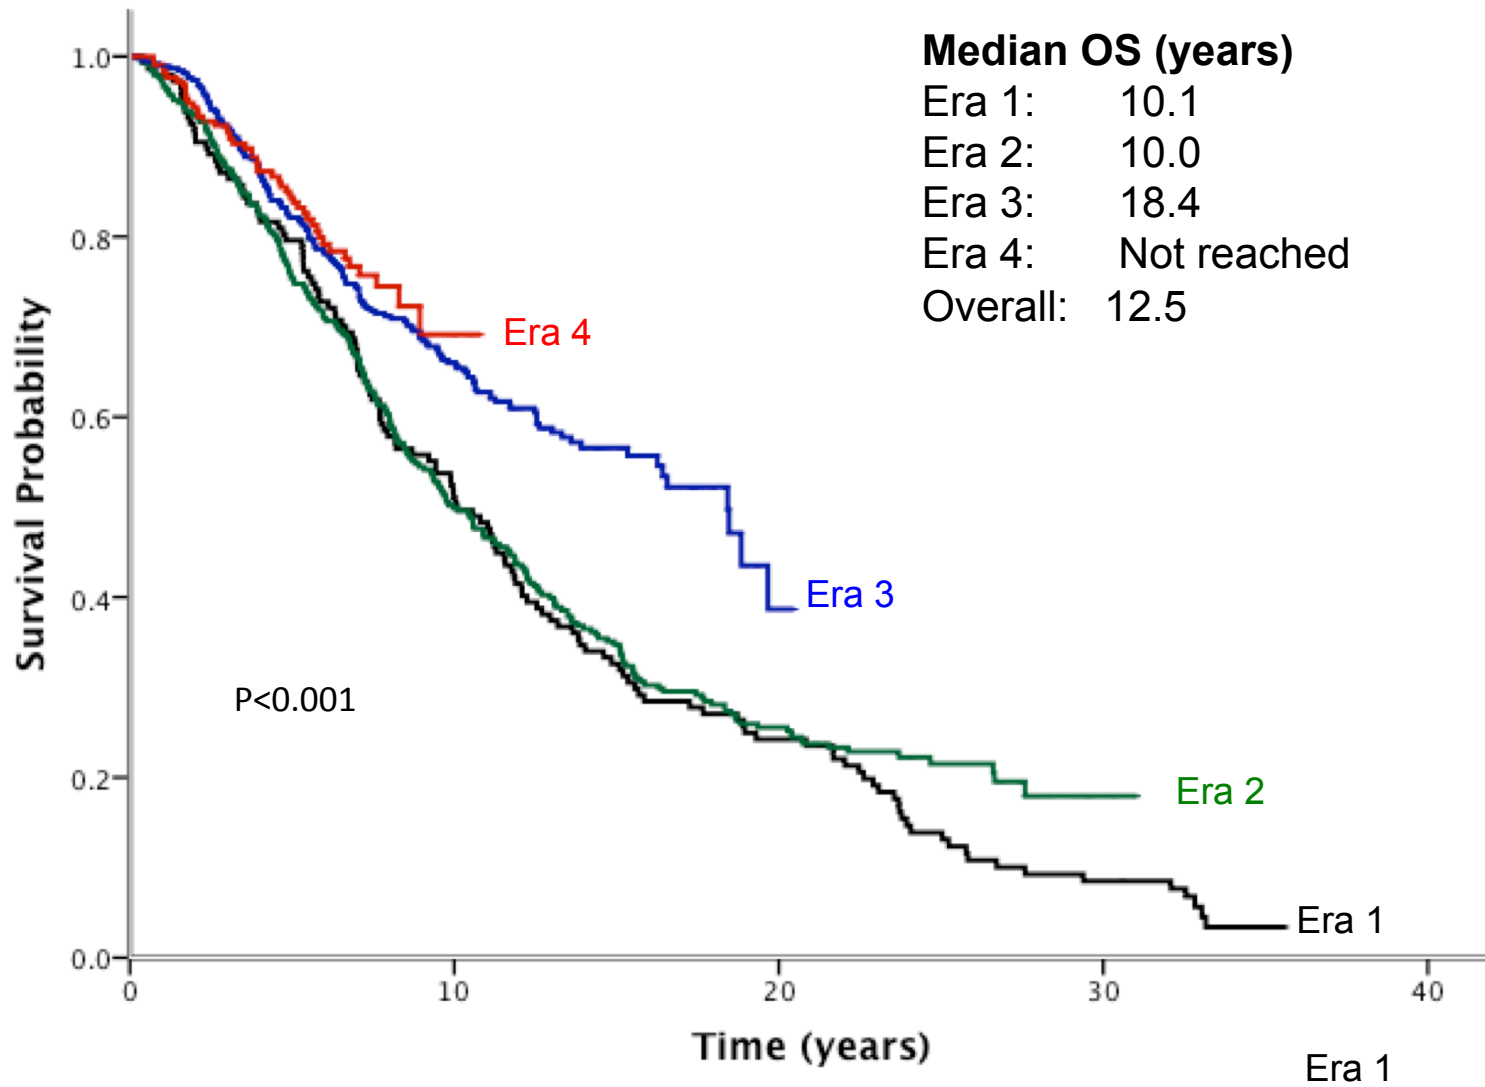

Supplementary Figure 3(A)

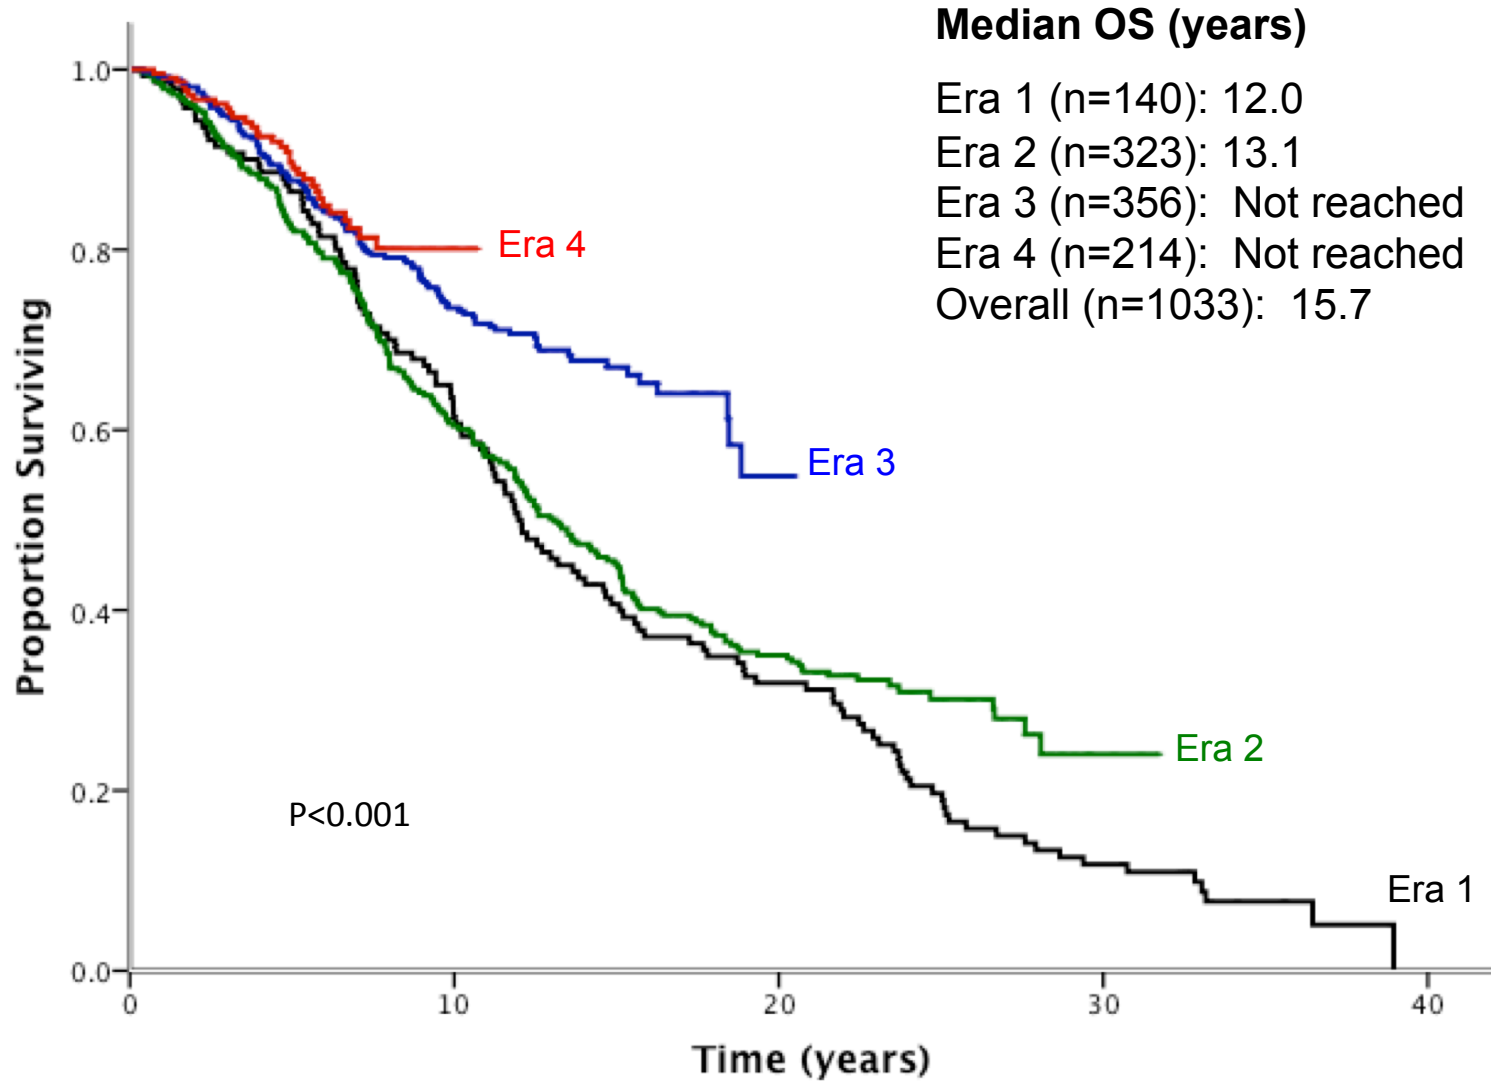

Supplementary Figure 3(B)

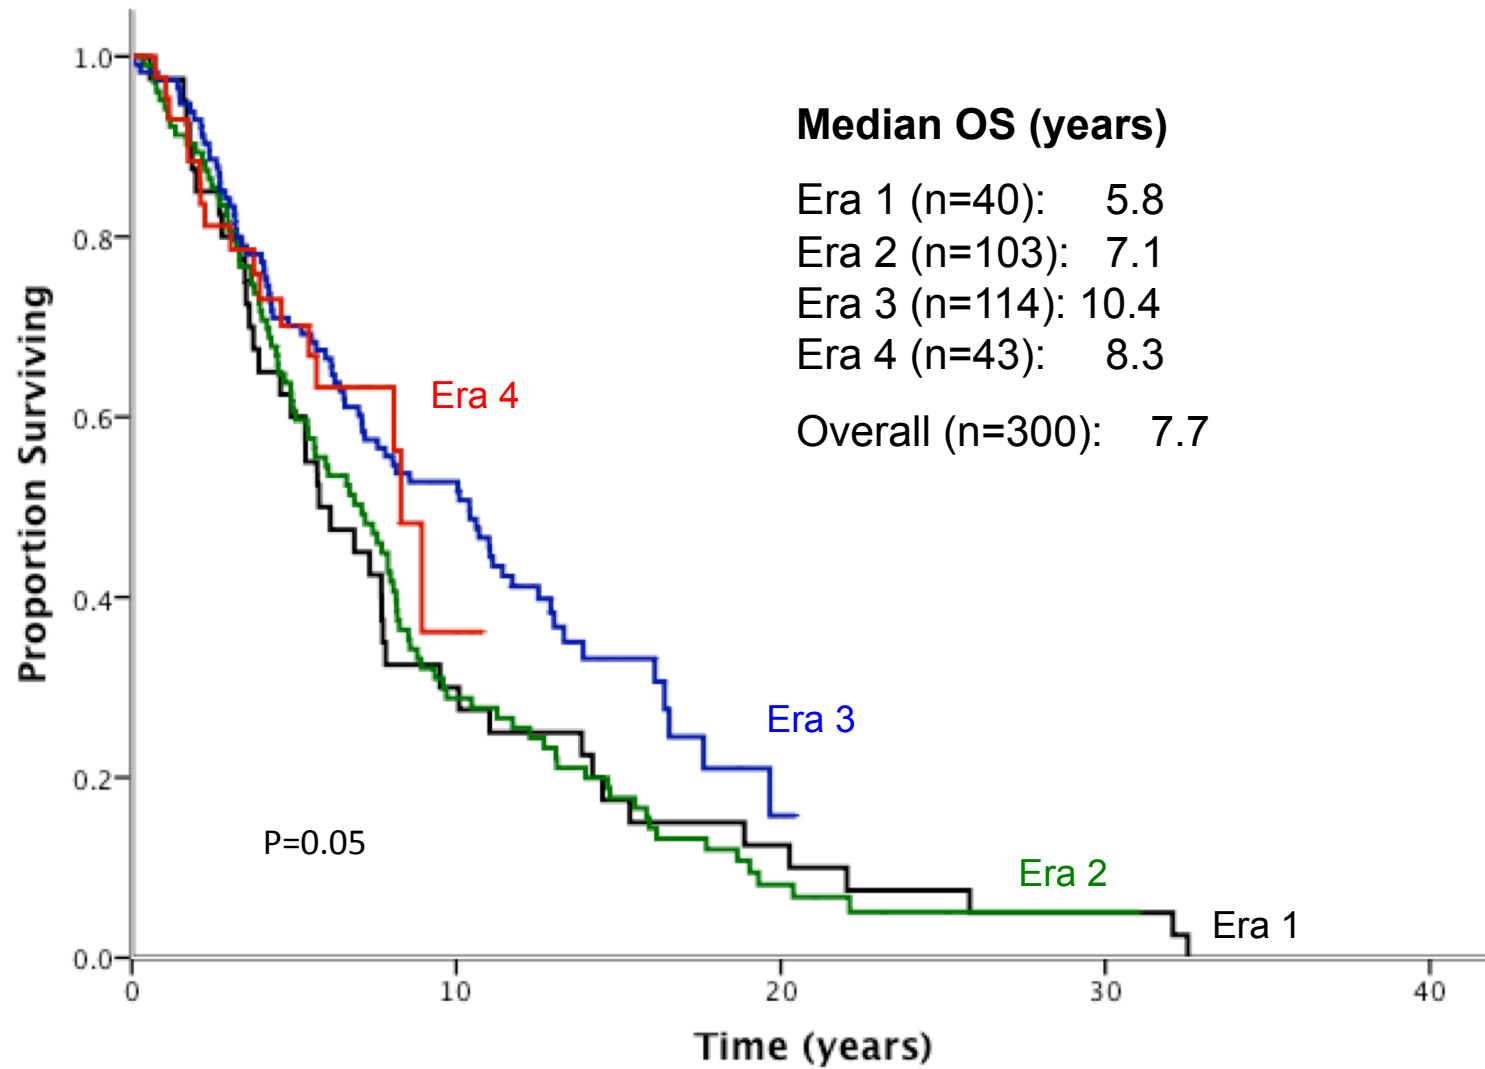

Supplementary Figure 4A

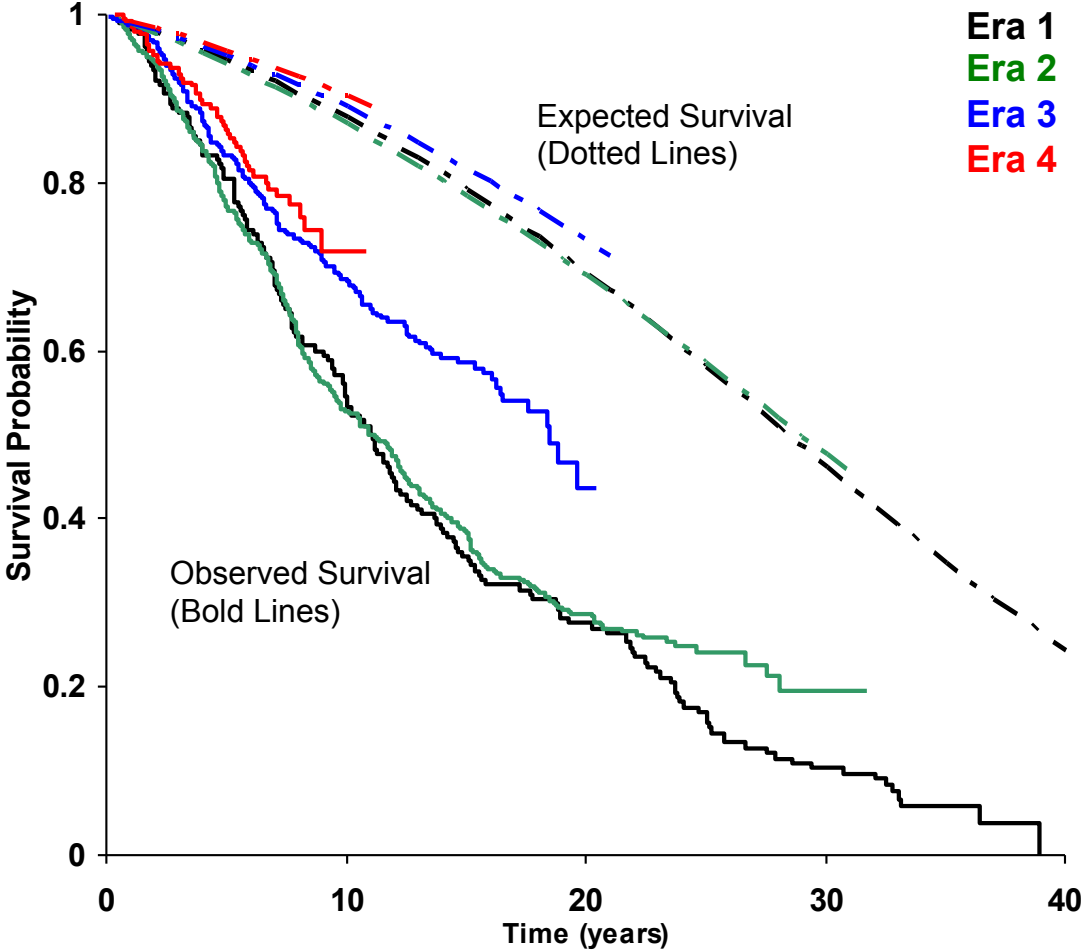

Supplementary Figure 4B

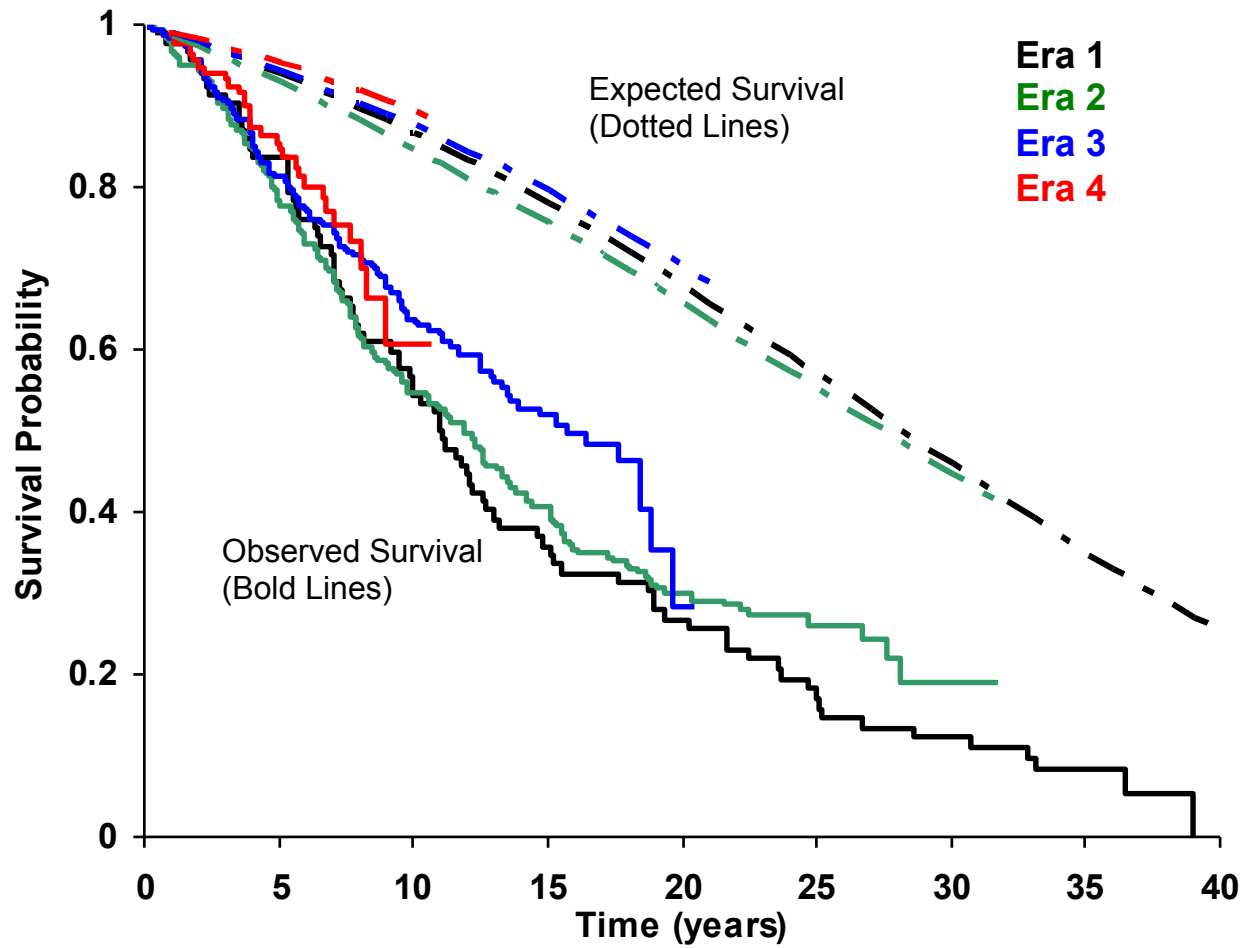



Supplementary Figure 4C

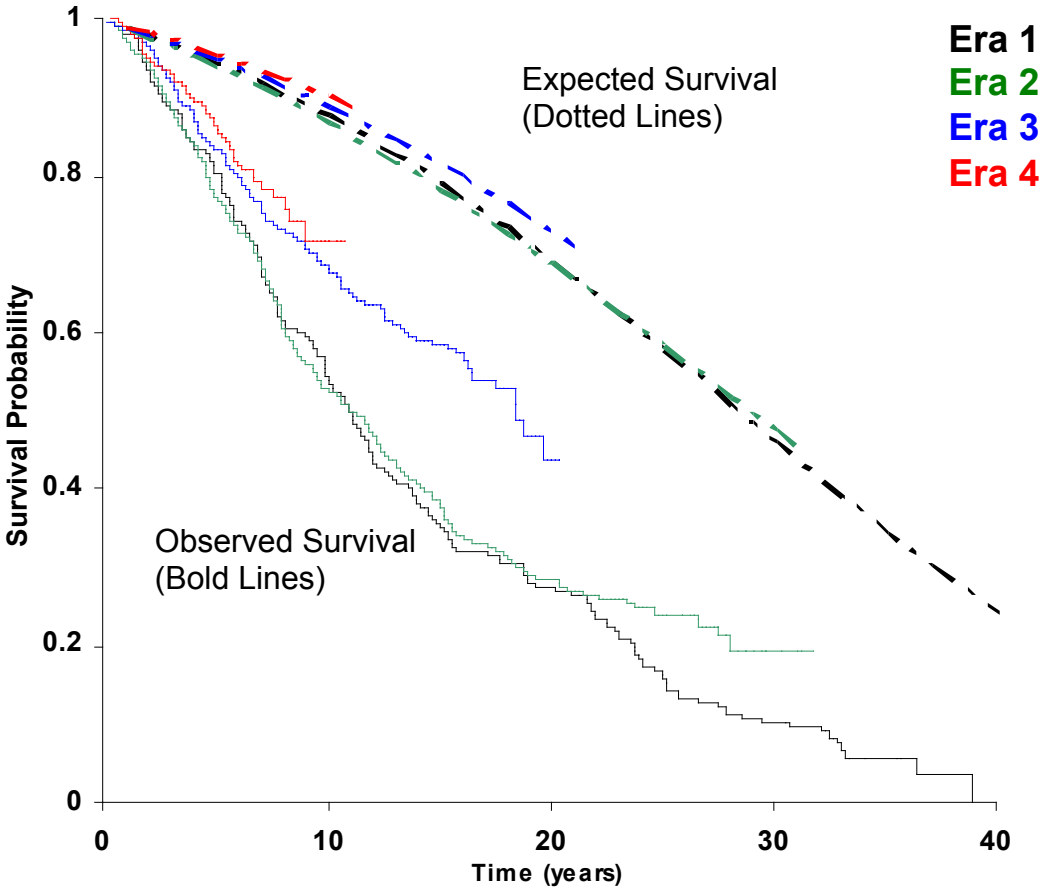

Supplementary Figure 5

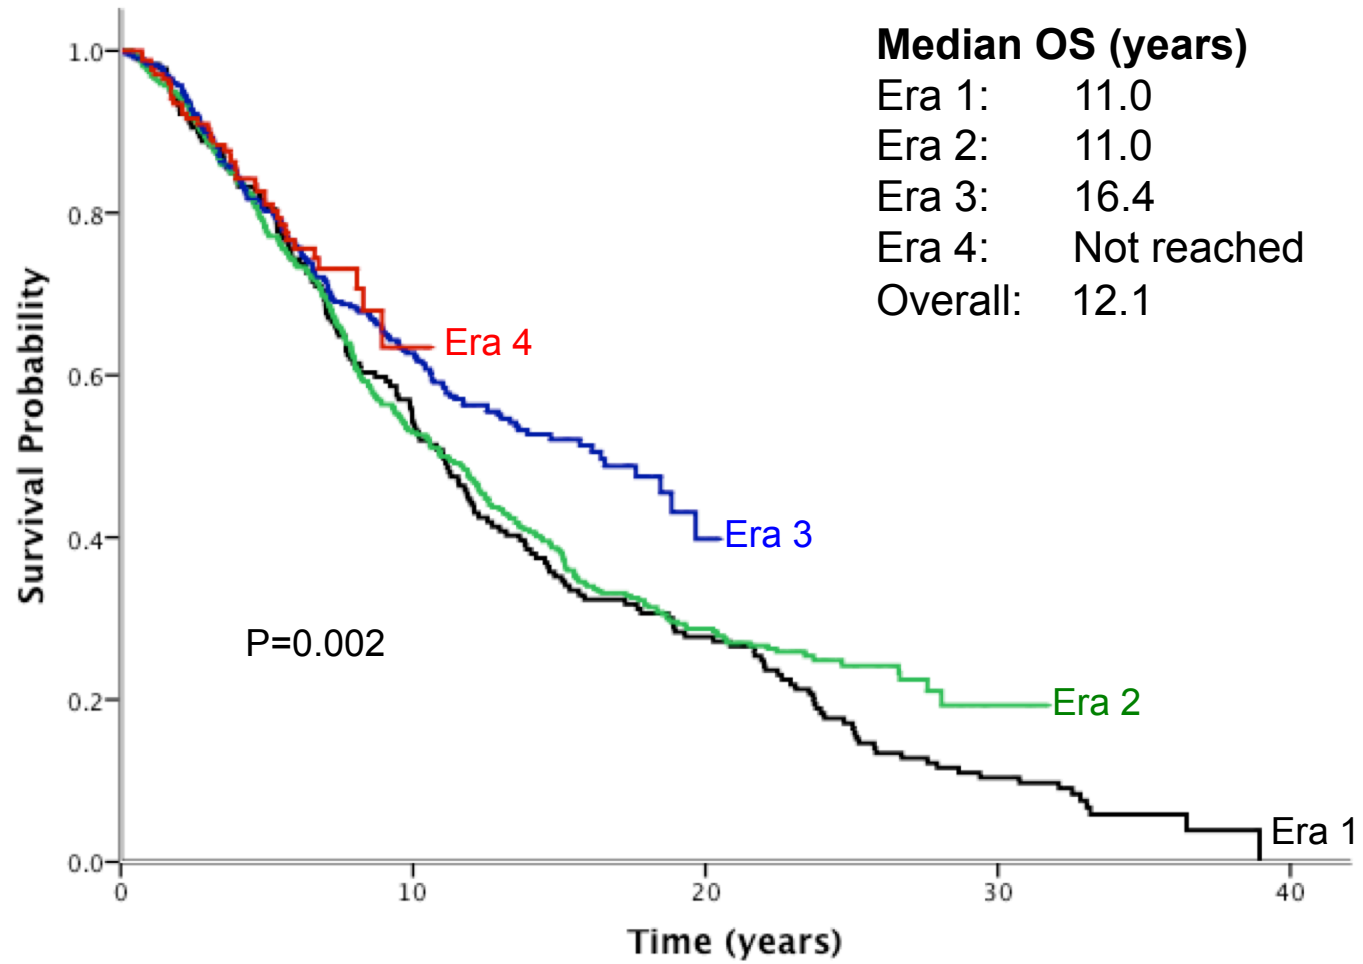

Supplementary Figure 6

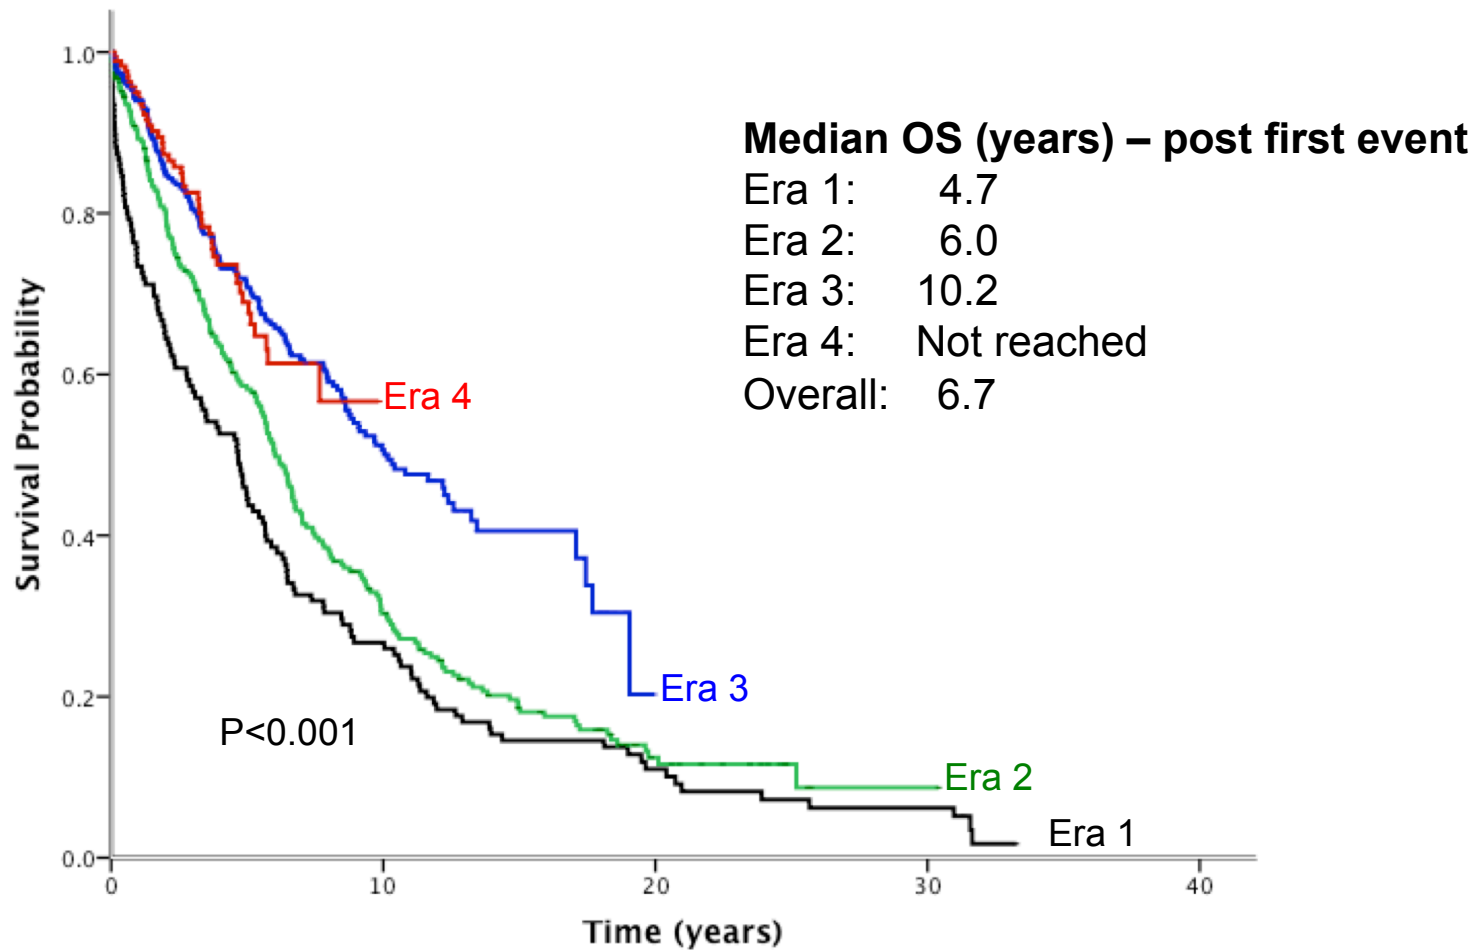

Supplement: supp_blood-2013-03-491514_blood-2013-03-491514-1.pdf [file supp_blood-2013-03-491514_blood-2013-03-491514-1.pdf]
